# Supplementary material for: Ruthenium oxide nanoparticles immobilized over Citrus limetta waste derived carbon material for electrochemical detection of hexestrol
Source: Royal Society of Chemistry journal article supplement (doi:10.1039/d0tb00263a), 2020-01-01
Supplement: d0tb00263a1.pdf [file d0tb00263a1.pdf]

**Supporting Information**

**Ruthenium oxide nanoparticles immobilized over citrus limetta waste derived carbon material for electrochemical detection of hexestrol**

Karan Chaudhary, Navin Kumar Mogha, Shubra Lalwani, Raj Kishore Sharma\* and Dhanraj T. Masram\*

Department of Chemistry, University of Delhi, Delhi, 110 007, India

## Instruments

CHNS analyzer (Elementar Analysensysteme Germany, Model- Vario Micro Cube), Fourier-transform infrared (FT-IR) spectroscopy (Thermo fisher FTIR spectrometer Model-NICOLET iS50Field), Field Emission Scanning Electron Microscope (ZEISS Gemini SEM-500) equipped with EDX, Transmission Electron Microscopy (TECNAI 200 kV) and N<sub>2</sub> adsorption/desorption analyzer (Quantachrome Autosorb, Model- ASI-CI-11) were used to characterize composition, morphology, and microstructure of the nanomaterials. X-ray diffraction (Model No. D8 DISCOVER), X-ray photoelectron spectroscopy (Model- PHI 5000 VersaProbe III) and Raman (Renishaw InVia Reflex Micro-Raman spectrometer) was used to study crystallographic information and chemical composition of the synthesized nanomaterials. Electrochemical sensing tests were carried out using CHI-760D electrochemical workstation with a three-electrode cell in which RuO<sub>2</sub>@PBC@ITO as working electrode, Pt sheet as an auxiliary and a saturated calomel electrode (SCE) was used as a reference electrode. All the measurements were carried out at room temperature.

## Table of contents

| Figures                                                                                                   | Page No. |
|-----------------------------------------------------------------------------------------------------------|----------|
| <b>Fig. S1</b> EDX analysis indicating the elemental composition of RuO <sub>2</sub> @PCB.                | S3       |
| <b>Fig. S2</b> FT-IR spectrum of PCB and RuO <sub>2</sub> @PCB.                                           | S4       |
| <b>Fig. S3</b> Graph for percentage peak current (anodic) of RuO <sub>2</sub> @PCB/ITO from CV with time. | S4       |

| Tables                                          | Page No. |
|-------------------------------------------------|----------|
| <b>Table S1.</b> CHNS elemental analysis of PCB | S3       |

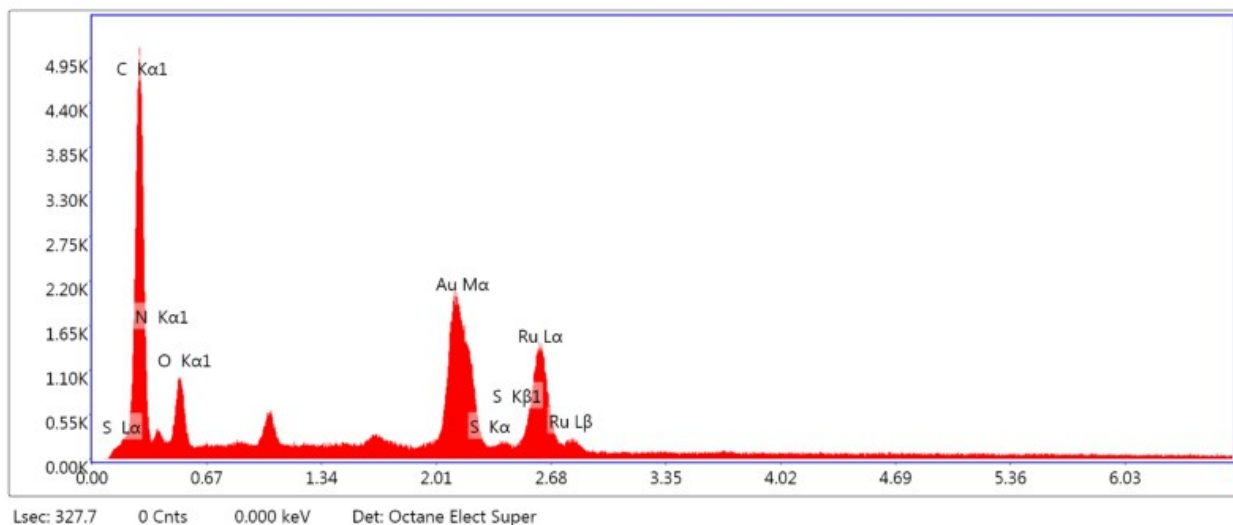

**eZAF Smart Quant Results**

| Element | Weight % | Atomic % | Net Int. | Error % | Kratio | Z      | A      | F      |
|---------|----------|----------|----------|---------|--------|--------|--------|--------|
| C K     | 31.91    | 72.76    | 180.50   | 6.60    | 0.2482 | 1.3737 | 0.5663 | 1.0000 |
| N K     | 2.29     | 4.48     | 5.30     | 21.27   | 0.0064 | 1.3379 | 0.2080 | 1.0000 |
| O K     | 7.02     | 12.02    | 32.00    | 11.28   | 0.0275 | 1.3067 | 0.2993 | 1.0000 |
| AuM     | 39.34    | 5.47     | 110.20   | 4.74    | 0.3104 | 0.6982 | 1.1273 | 1.0021 |
| S K     | 0.00     | 0.00     | 0.00     | 99.99   | 0.0000 | 1.1521 | 0.8657 | 0.9981 |
| RuL     | 19.44    | 5.27     | 56.30    | 4.75    | 0.1536 | 0.8412 | 0.9390 | 1.0002 |

**Fig. S1** EDX analysis indicating the elemental composition of RuO<sub>2</sub>@PCB.

**Table S1.** CHNS elemental analysis of PCB

| Sample | N (%) | C (%) | H (%) | S (%) | C/N Ratio | C/H Ratio |
|--------|-------|-------|-------|-------|-----------|-----------|
| PCB    | 3.45  | 50.36 | 3.956 | 0.042 | 14.6081   | 12.7316   |

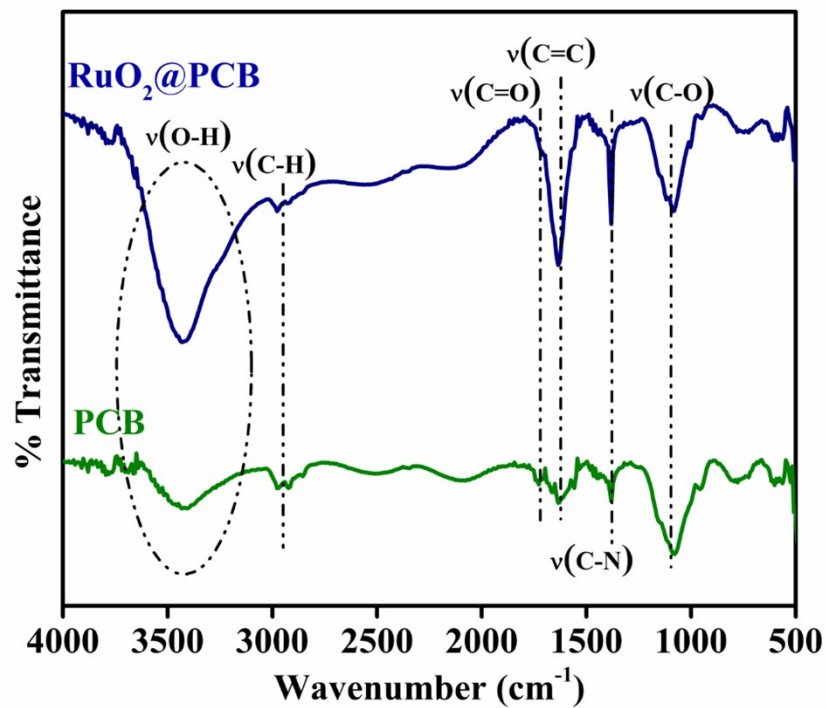

Fig. S2 FT-IR spectrum of PCB and RuO<sub>2</sub>@PCB.

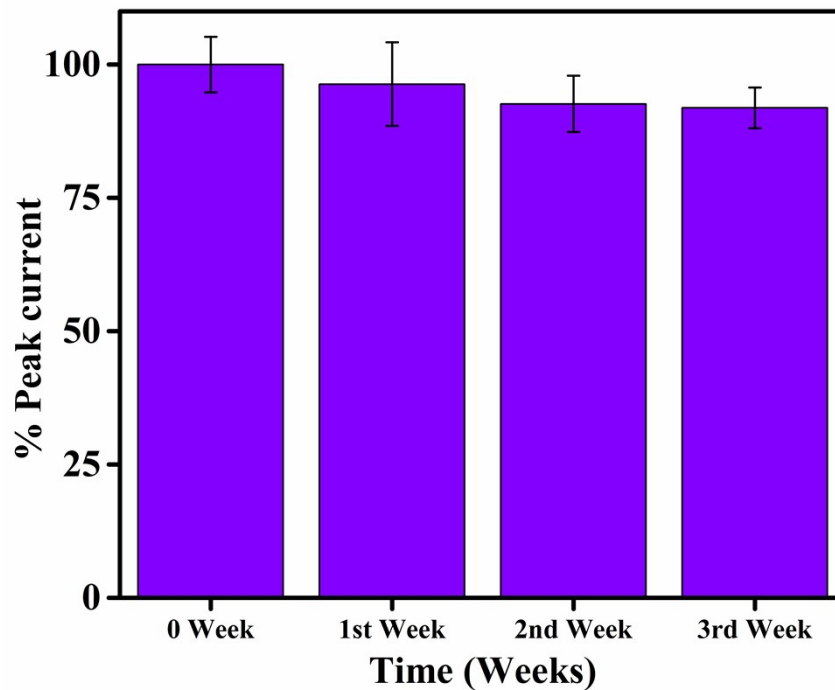

Fig. S3 Graph for percentage peak current (anodic) of RuO<sub>2</sub>@PCB/ITO from CV with time.
